# Supplementary material for: Freshwater–Saltwater Interactions in a Multilayer Coastal Aquifer (Ostia Antica Archaeological Park, Central ITALY)
Source: MDPI journal article supplement (doi:10.3390/w13131866), 2021-07-04
Supplement: s1 [file s1]

**Table S1.** Temperature, Electrical Conductivity (EC), pH and water table elevation of groundwater

| Field surveys<br>2016 | Id  | TEMP (°C) | EC (25 °C)<br>μS/cm | pH   | Water table elevation<br>(m a.s.l.) |
|-----------------------|-----|-----------|---------------------|------|-------------------------------------|
| <b>April</b>          | P1  | 15,2      | 2010                | 8    | -0,21                               |
|                       | P2  | 14,6      | 918                 | 8    | -0,13                               |
|                       | P3  | 15,6      | 923                 | 6,8  | -0,11                               |
|                       | P4  | 13,9      | 916                 | 7,6  | -1,31                               |
|                       | P5  | 16,5      | 1951                | 7,6  | 0,01                                |
|                       | P6  | 16,2      | 2940                | 7,4  | -1,01                               |
|                       | P7  | 15,1      | 1339                | 7,8  | -0,71                               |
| <b>June</b>           | P1  | 16,9      | 2000                | 6,5  | -0,5                                |
|                       | P2  | 16,2      | 1010                | 5,9  | -0,34                               |
|                       | P3  | 18,2      | 1439                | 6,5  | -0,29                               |
|                       | P4  | -         | -                   | -    | -                                   |
|                       | P5  | 16,9      | 2390                | 6,8  | 0,01                                |
|                       | P6  | 16,9      | 3300                | 7    | -1,35                               |
|                       | P7  | 17,1      | 1428                | 6,8  | -1,12                               |
| <b>October</b>        | P1  | 19,2      | 1954                | 7,4  | -0,57                               |
|                       | P2  | 18        | 992                 | 6,5  | -0,54                               |
|                       | P3  | 19,5      | 1425                | 6,5  | -0,39                               |
|                       | P4  | -         | -                   | -    | -                                   |
|                       | P5  | 20,8      | 2140                | 6,8  | 0,01                                |
|                       | P6  | 20,3      | 3000                | 7    | -1,44                               |
|                       | P7  | 20,6      | 1477                | 6,8  | -1,2                                |
|                       | P9  | -         | -                   | -    | -0,19                               |
|                       | P10 | 18,2      | 416                 | 8    | -0,15                               |
| <b>December</b>       | P1  | 15,9      | 1982                | 7,9  | -0,03                               |
|                       | P2  | 14,8      | 896                 | 8,3  | 0,04                                |
|                       | P3  | 16,3      | 920                 | 7,7  | 0,11                                |
|                       | P4  | -         | -                   | -    | -                                   |
|                       | P5  | 11,7      | 1558                | 7,9  | -0,31                               |
|                       | P6  | 16,3      | 4820                | 7,11 | -0,68                               |
|                       | P7  | 17,3      | 2570                | 7,4  | -0,41                               |
|                       | P8  | 15,8      | 454                 | 7,9  | -0,22                               |
|                       | P9  | 12,3      | 530                 | 8,3  | 0,39                                |
|                       | P10 | 15,5      | 404                 | 8,1  | 0,37                                |

**Table S2.** Major ions and bromide concentration (meq/L) in groundwater of Ostia Antica archeological park. Cl/Br ratio is expressed as molar ratio to fit Figure 9, modified from [30].

|                 | HCO <sup>3-</sup> | Cl <sup>-</sup> | SO <sub>4</sub> <sup>2-</sup> | Ca <sup>2+</sup> | Mg <sup>2+</sup> | Na <sup>2+</sup> | K <sup>+</sup> | Br <sup>-</sup> | Cl <sup>-</sup> / Br <sup>-</sup> |
|-----------------|-------------------|-----------------|-------------------------------|------------------|------------------|------------------|----------------|-----------------|-----------------------------------|
| <b>April</b>    |                   |                 |                               |                  |                  |                  |                |                 |                                   |
| P1              | 11,20             | 9,20            | 4,38                          | 3,53             | 3,47             | 14,33            | 1,76           | 0,040           | 231                               |
| P2              | 5,33              | 3,50            | 1,38                          | 2,00             | 2,53             | 3,55             | 1,32           | 0,013           | 260                               |
| P3              | 7,33              | 2,40            | 1,13                          | 4,87             | 1,00             | 2,89             | 0,79           | 0,009           | 266                               |
| P4              | 5,47              | 2,34            | 2,81                          | 3,07             | 1,33             | 3,22             | 1,56           | 0,008           | 279                               |
| P5              | 6,87              | 10,00           | 3,02                          | 6,40             | 3,07             | 7,75             | 0,35           | 0,032           | 308                               |
| P6              | 9,13              | 19,20           | 3,33                          | 14,27            | 4,33             | 8,41             | 1,08           | 0,054           | 358                               |
| P7              | 5,80              | 6,60            | 2,71                          | 6,93             | 2,53             | 3,80             | 0,28           | 0,023           | 285                               |
| <b>June</b>     |                   |                 |                               |                  |                  |                  |                |                 |                                   |
| P1              | 10,67             | 7,30            | 4,00                          | 1,80             | 4,20             | 13,37            | 1,65           | 0,052           | 139                               |
| P2              | 7,20              | 2,89            | 1,80                          | 3,40             | 1,53             | 4,11             | 1,29           | 0,016           | 179                               |
| P3              | 11,27             | 3,71            | 2,30                          | 6,33             | 2,40             | 6,00             | 1,34           | 0,019           | 199                               |
| P5              | 6,40              | 12,43           | 4,80                          | 7,13             | 2,20             | 13,37            | 0,47           | 0,054           | 231                               |
| P6              | 10,87             | 16,99           | 4,30                          | 8,40             | 6,20             | 11,31            | 1,03           | 0,066           | 429                               |
| P7              | 6,13              | 6,71            | 2,00                          | 7,13             | 2,07             | 5,13             | 0,42           | 0,027           | 248                               |
| <b>October</b>  |                   |                 |                               |                  |                  |                  |                |                 |                                   |
| P1              | 9,60              | 4,30            | 4,00                          | 1,67             | 4,20             | 10,62            | 1,34           | 0,020           | 217                               |
| P2              | 7,13              | 2,10            | 1,90                          | 3,13             | 1,67             | 4,28             | 0,98           | 0,012           | 174                               |
| P3              | 9,53              | 4,60            | 0,40                          | 7,27             | 2,27             | 5,65             | 1,29           | 0,021           | 217                               |
| P5              | 6,60              | 7,80            | 4,60                          | 7,47             | 2,67             | 12,34            | 0,47           | 0,033           | 241                               |
| P6              | 11,00             | 12,20           | 4,80                          | 13,53            | 1,93             | 10,97            | 0,78           | 0,049           | 247                               |
| P7              | 5,93              | 6,30            | 1,60                          | 6,73             | 2,67             | 5,82             | 0,42           | 0,033           | 193                               |
| P10             | 3,10              | 0,40            | 0,50                          | 1,87             | 0,40             | 1,79             | 0,49           | 0,003           | 149                               |
| <b>December</b> |                   |                 |                               |                  |                  |                  |                |                 |                                   |
| P1              | 8,60              | 7,70            | 2,40                          | 2,20             | 4,00             | 8,83             | 0,95           | 0,042           | 187                               |
| P2              | 3,80              | 2,40            | 0,60                          | 2,80             | 2,53             | 2,47             | 0,72           | 0,014           | 179                               |
| P3              | 4,40              | 2,40            | 2,00                          | 3,13             | 1,80             | 3,28             | 0,72           | 0,012           | 202                               |
| P5              | 5,53              | 6,40            | 2,90                          | 7,13             | 1,80             | 5,91             | 0,26           | 0,024           | 269                               |
| P6              | 8,27              | 43,40           | 4,30                          | 20,47            | 9,47             | 12,72            | 1,41           | 0,108           | 415                               |
| P7              | 3,07              | 22,30           | 0,80                          | 10,40            | 3,60             | 6,56             | 0,72           | 0,055           | 417                               |
| P8              | 3,20              | 0,60            | 1,50                          | 2,13             | 1,60             | 2,01             | 0,49           | 0,003           | 199                               |
| P9              | 3,27              | 0,80            | 0,40                          | 1,47             | 1,20             | 2,15             | 0,72           | 0,005           | 191                               |
| P10             | 2,53              | 0,40            | 1,10                          | 1,60             | 0,60             | 1,69             | 0,26           | 0,003           | 159                               |

**Table S3.** Average BEX of groundwater, sensu [27], sampled in the year 2016. Four groups of samples representing waters with homogenous and similar compositions were selected: the shallowest (wells P2, P3, P8, P9, P10) and the deepest (wells P6 and P7) circulations, Tevere River (P5) and well P1. The table also reports average saturation index (SI) for calcite.

| Sample              | Average BEX<br>(meq/l) | Average SI (calcite) |
|---------------------|------------------------|----------------------|
| P1                  | - 0, 8                 | 0,27                 |
| P2, P3, P8, P9, P10 | -1,9                   | -0.21, -0.07, 0.28 ° |
| P5                  | 0,15                   | 0.35                 |
| P6, P7              | 0,5                    | 0.55, 0.23           |

° average SI of this line are referred to wells P2, P3 and P10

**Table S4.** Eigenvectors extracted from the correlation matrix of 11 physico-chemical variables of groundwater. Data are available in Table S1 and S2.

|                       | Coefficients of PC1 | Coefficients of PC2 |
|-----------------------|---------------------|---------------------|
| HCO3                  | 0,24535             | 0,50266             |
| Cl                    | 0,34978             | -0,27013            |
| SO4                   | 0,28634             | 0,27301             |
| Ca                    | 0,31461             | -0,32412            |
| Mg                    | 0,34164             | -0,03162            |
| Na                    | 0,31536             | 0,29489             |
| K                     | 0,13994             | 0,50125             |
| Br                    | 0,37095             | -0,09013            |
| Water table elevation | 0,27639             | -0,37673            |
| Br/Cl                 | 0,38274             | -0,06773            |
| EC                    | -0,20064            | -0,0304             |
